# Supplementary material for: Expanding the Clinical and Mutational Spectrum of the PLP1-Related Hypomyelination of Early Myelinated Structures (HEMS)
Source: MDPI journal article supplement (doi:10.3390/brainsci11010093), 2021-01-13

## Supplementary Files

**Table S1:** Genotype-phenotype correlations in PLP1-related disorders, listed by increasing severity, from the most severe (i.e. connatal and classic PMD) to intermediate (i.e. PLP1-null syndrome, complex SPG2 and HEMS) to mildest (i.e., pure SPG2) forms. ° The term “null” refers to a pathogenic variant that results in either no mRNA, no protein, or a nonfunctional protein.

| Phenotype                  | Genotype                                                                          | Age of onset                    | Neurological features                                                                                                                                                          | Brain MRI                                                                                                                        | Disease's course                                                                                                                    |
|----------------------------|-----------------------------------------------------------------------------------|---------------------------------|--------------------------------------------------------------------------------------------------------------------------------------------------------------------------------|----------------------------------------------------------------------------------------------------------------------------------|-------------------------------------------------------------------------------------------------------------------------------------|
| <b>Connatal PMD</b>        | Missense (in highly conserved regions); rarely duplication (three or more copies) | Neonatal period                 | Nystagmus from birth; severe hypotonia evolving into spasticity; laryngeal stridor; dysphagia; seizures are possible                                                           | Severe diffuse hypomyelination                                                                                                   | Severe intellectual disability with absent language; no autonomous walking; Age at death: infancy to 3th decade                     |
| <b>Classic PMD</b>         | Duplication                                                                       | 1-5 year                        | Nystagmus in the first 1-2 months of life; hypotonia evolving into spasticity; ataxia head titubation; psychomotor delay; extrapyramidal features (dystonia, choreo-athetosis) | Diffuse hypomyelination                                                                                                          | If acquired, deambulation is usually lost in infancy or in adolescence; verbal communication possible; Age at death: 3th-7th decade |
| <b>PLP1-null syndrome</b>  | “Null” mutation°                                                                  | 1-5 year                        | No nystagmus; mild spastic quadriparesis; ataxia; peripheral demyelinating neuropathy; psychomotor delay                                                                       | Diffuse hypomyelination                                                                                                          | Mild-to-moderate cognitive impairment; Autonomous walking and verbal communication are present; Age at death: 5th-7th decade        |
| <b>SPG2 (complex form)</b> | Missense (in less conserved regions)                                              | 1-5 year                        | Nystagmus; spastic-ataxia; autonomic dysfunction (spastic urinary bladder); mild psychomotor delay                                                                             | Less severe abnormalities consisting in T2-weighted patchy abnormalities or more diffuse hypomyelination                         | Walking and verbal communication are present; Mild-to-moderate cognitive impairment Age at death: 4th-7th decade                    |
| <b>HEMS</b>                | Intron or exon 3B                                                                 | 1-2 year                        | Nystagmus; spastic-ataxia; autonomic dysfunction (spastic urinary bladder); mild psychomotor delay                                                                             | Hypomyelination of early myelinated structures (erebellum, brainstem, optic radiations, posterior limb of the internal capsulae) | Walking and verbal communication are present; Mild-to-moderate cognitive impairment                                                 |
| <b>SPG2 (pure form)</b>    | Missense (in less conserved regions)                                              | 1-5 year; rarely 3th-4th decade | Spastic paraparesis with no adjunctive features                                                                                                                                | Less severe abnormalities consisting in T2-weighted patchy abnormalities                                                         | Walking and verbal communication are present; No cognitive delay                                                                    |

**Figure S1.** Evolution of brain MRI anomalies in patient 3 (please refer to Table 2 for details).

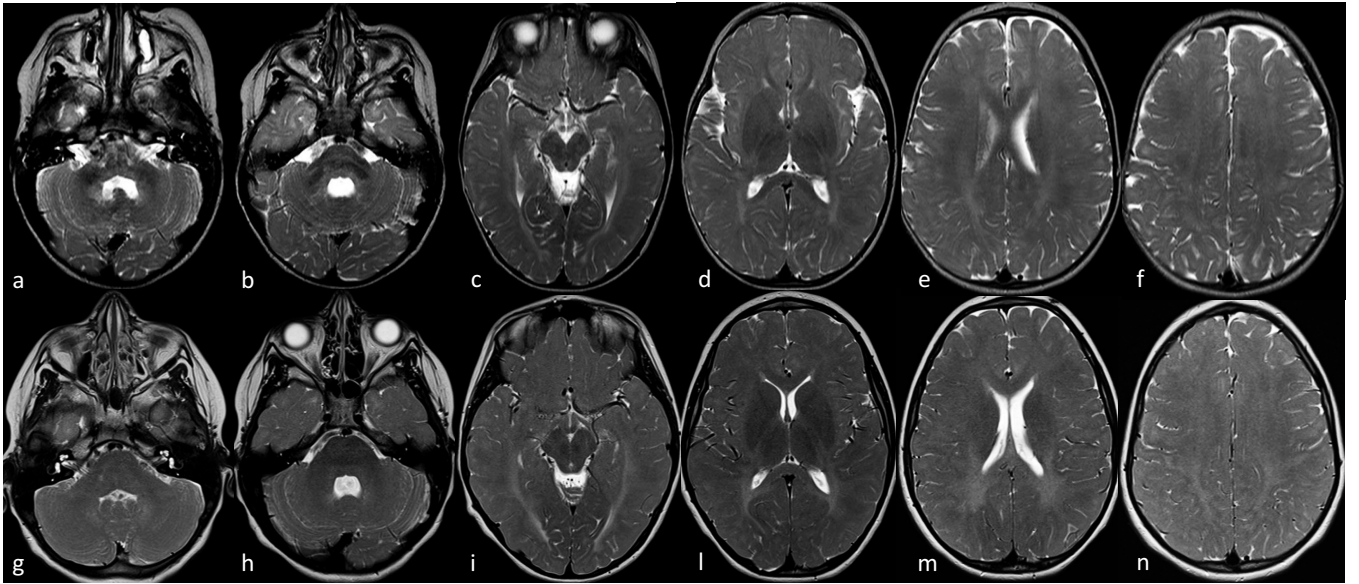

Supplement: s1 [file s1]
